# Supplementary material for: MCC950, the NLRP3 Inhibitor, Protects against Cartilage Degradation in a Mouse Model of Osteoarthritis
Source: Hindawi journal article supplement (doi:10.1155/2021/4139048), 2021-01-01
Supplement: f1 [file 4139048.f1.pdf]

## Supplementary Figure.1

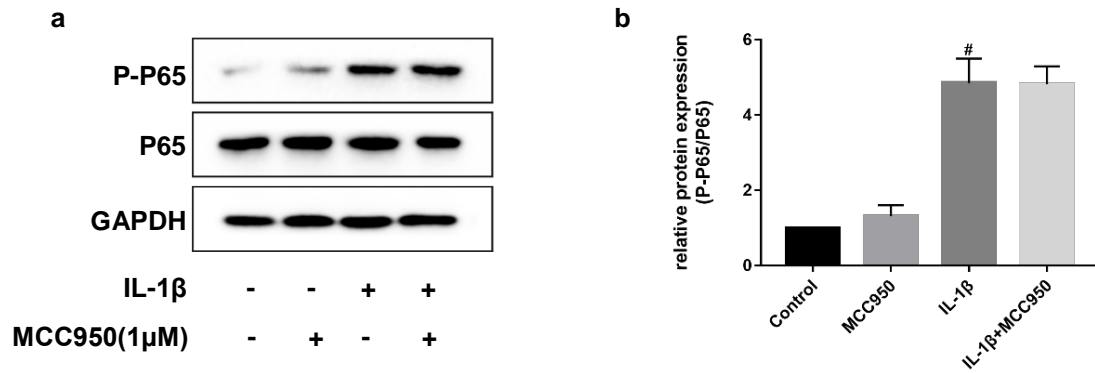

**Supplementary Figure.1: MCC950 did not inhibit the activation of P65/NF- $\kappa$ B pathway in IL-1 $\beta$ -treated mouse chondrocytes.** (a) Western blotting results of P65/NF- $\kappa$ B pathway proteins. (b) Quantification analysis of P65/NF- $\kappa$ B pathway proteins expression. Data are shown as the mean  $\pm$  SD. Significant differences between groups are indicated as # $P$ <0.05 vs control group; \* $P$ <0.05 vs IL-1 $\beta$  group.
